# Supplementary material for: Complications and discomfort after research bronchoscopy in the MicroCOPD study
Source: PubMed Central journal article supplement — BMJ Open Respir Res. 2020 Mar 9;7(1):e000449. doi: 10.1136/bmjresp-2019-000449 (PMC7064136; doi:10.1136/bmjresp-2019-000449), 2020-03-09
Supplement: bmjresp-2019-000449supp002.pdf [file bmjresp-2019-000449supp002.pdf]

## Subject experience from bronchoscopy

| Question                                                                                                                                                                                                                         | Immediately after | After the observation | After 1 week  |
|----------------------------------------------------------------------------------------------------------------------------------------------------------------------------------------------------------------------------------|-------------------|-----------------------|---------------|
| A. What do you think of the procedure now? Have you had any discomforts (which?) ( <b>Open question</b> )                                                                                                                        | 13.1a             | 13.1b                 | 13.1c         |
| B. How <b>uncomfortable</b> did you find this experience, taking into consideration everything that has happened until now, on a scale from 0 to 10, where 10 is the most uncomfortable you can imagine, and 0 is no discomfort. | 13.2a             | 13.2b                 | 13.2c         |
| C. For how long do you think the procedure lasted?                                                                                                                                                                               | 13.3a             |                       |               |
| 1. How short of breath are you now? (Borg scale), 0-10 (show Borg scale)                                                                                                                                                         | 13.4a             | 13.4b                 | 13.4c         |
| 2. If you were asked to participate in a <b>new</b> research project involving the <b>same procedure</b> , would you participate? (if yes, go to question 4, if no, ask question 3)                                              | 13.5a             | 13.5b                 | 13.5c         |
| 3. If your doctor advised you to undergo this type of procedure, would then have done it <b>again</b> ?                                                                                                                          | 13.6a             | 13.6b                 | 13.6c         |
| 4. Do you have a <b>sensation of fever</b> in your body now, or have you had fever/fever sensation in relation to bronchoscopy or after the procedure?                                                                           | 13.7a             | 13.7b                 | 13.7c         |
| 5. Did you cough <b>blood</b> or red/light red saliva?                                                                                                                                                                           | 13.8a             | 13.8b                 | 13.8c         |
| <b>6. Have you, after the procedure, experienced</b>                                                                                                                                                                             |                   |                       |               |
| a. Increased breathlessness, dyspnoea or tightening of the chest? ( <i>Synonymous words</i> )?                                                                                                                                   | 13.9a             | 13.9b                 | 13.9c         |
| b. Increased sputum?                                                                                                                                                                                                             | 13.10a            | 13.10b                | 13.10c        |
| c. Sputum colour change?                                                                                                                                                                                                         | 13.11a            | 13.11b                | 13.11c        |
| d. Increased rhinitis/stuffed nose?                                                                                                                                                                                              | 13.12a            | 13.12b                | 13.12c        |
| e. Increased wheezing chest sounds?                                                                                                                                                                                              | 13.13a            | 13.13b                | 13.13c        |
| f. Soar throat/increased cough?                                                                                                                                                                                                  | 13.14a            | 13.14b                | 13.14c        |
| g. Increased fatigue/lack of initiative?                                                                                                                                                                                         | 13.15a            | 13.15b                | 13.15c        |
| f. flu symptoms (fever, muscle/joint ache, headache, reduced general condition)?                                                                                                                                                 | 13.16a            | 13.16b                | 13.16c        |
| 7. Have you, after the procedure, needed to <b>seek a doctor/call</b> (unscheduled), use <b>antibiotics</b> , receive cortisone/ <b>prednisolone</b> or be admitted to <b>hospital</b> ? (if yes, note what, and cause)          |                   |                       | 13.17, 13.17a |
| 8. Have you, in relation to the procedure or after received any new treatment? In case, which? (type of treatment, if drug – dosage ect)                                                                                         |                   |                       | 13.18         |
| 9. Note if the participant has been in contact with a physician or the study personnel outside of standard follow-up – reason for contact, date and intervention.                                                                |                   |                       | 13.19         |
